# Supplementary material for: Association of red blood cell transfusion and in-hospital mortality in patients admitted to the intensive care unit: a systematic review and meta-analysis
Source: PubMed Central journal article supplement (PMC4256753; doi:10.1186/s13054-014-0515-z), 2014-11-14

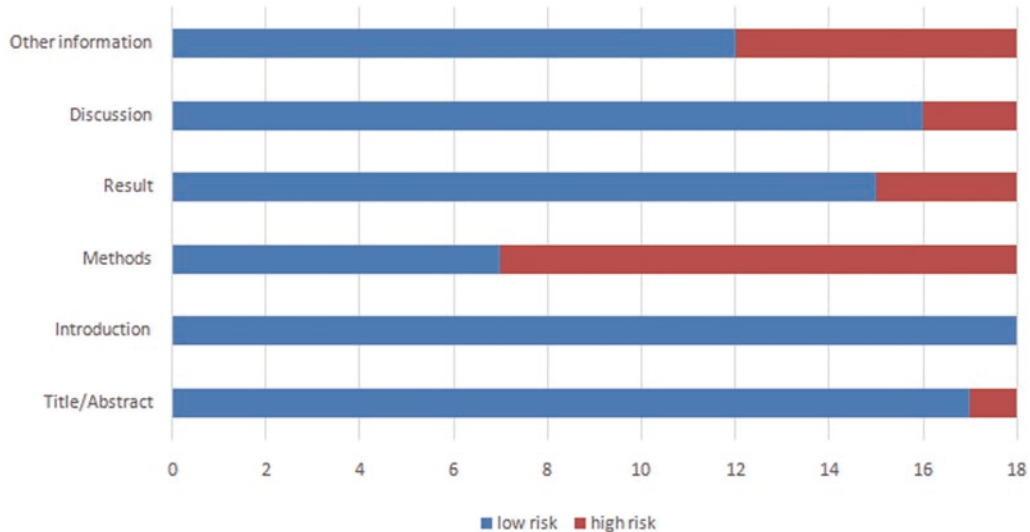

Supplement: 13054_2014_515_MOESM1_ESM.pdf [file 13054_2014_515_MOESM1_ESM.pdf]
